# Supplementary material
Source: PubMed Central journal article supplement (PMC6251598)
Supplement: nly010_supp.pdf [file nly010_supp.pdf]

Supplemental Table 1

## Angular gyrus

| Case ID | Neuropathological diagnosis | PHF1 | GT-7 | GT-38 | RD3 | RD4 |
|---------|-----------------------------|------|------|-------|-----|-----|
| 100440  | AD                          | +    | +    | +     | NT  | NT  |
| 102149  | CBD                         | +    | -    | -     | NT  | NT  |
| 110181  | PSP                         | +    | -    | -     | NT  | NT  |
| 106309  | PiD                         | +    | -    | -     | NT  | NT  |

## Hippocampus

| Case ID | Neuropathological diagnosis | PHF1 | GT-7 | GT-38 | RD3 | RD4 |
|---------|-----------------------------|------|------|-------|-----|-----|
| 115892  | AD                          | +    | +    | +     | +   | +   |
| 106239  | AD                          | +    | +    | +     | +   | +   |
| 107536  | AD                          | +    | +    | +     | NT  | NT  |
| 100666  | AD                          | +    | +    | +     | NT  | NT  |
| 107718  | AD                          | +    | +    | +     | NT  | NT  |
| 107696  | AD                          | +    | +    | +     | NT  | NT  |
| 112648  | AD                          | +    | +    | +     | NT  | NT  |
| 105398  | AD                          | +    | +    | +     | NT  | NT  |
| 106761  | AD                          | NT   | +    | +     | NT  | NT  |
| 108441  | AD                          | +    | +    | +     | NT  | NT  |
| 106229  | AD                          | NT   | +    | +     | NT  | NT  |
| 112964  | CBD                         | +    | -    | -     | -   | +   |
| 105358  | CBD                         | +    | -    | -     | -   | +   |
| 104281  | CBD                         | +    | -    | NT    | -   | NT  |
| 114762  | CBD                         | +    | -    | NT    | -   | NT  |
| 108196  | CBD                         | +    | -    | NT    | -   | NT  |
| 116508  | CBD                         | +    | -    | -     | -   | +   |
| 114348  | PSP                         | +    | +    | +     | +   | +   |
| 111530  | PSP                         | +    | +/-  | +/-   | +   | +   |
| 106959  | PSP                         | +    | +/-  | +/-   | +   | +   |
| 112401  | PSP                         | +    | -    | +/-   | -   | -   |
| 101483  | PSP                         | +    | -    | -     | -   | +   |
| 114511  | PSP                         | +    | -    | -     | -   | +   |
| 103782  | PSP                         | +    | +    | +     | +   | +   |
| 104282  | PSP                         | +    | +/-  | +/-   | +   | +   |

|        |                              |    |     |    |     |     |
|--------|------------------------------|----|-----|----|-----|-----|
| 107667 | PiD                          | +  | -   | -  | -   | +   |
| 111853 | PiD                          | +  | -   | -  | +   | -   |
| 105564 | PiD                          | +  | -   | -  | +   | +/- |
| 107187 | PiD                          | +  | -   | NT | +   | -   |
| 106309 | PiD                          | +  | +/- | NT | +   | +   |
| 106814 | PiD                          | +  | -   | NT | +   | +   |
| 108508 | PiD                          | +  | +/- | NT | +   | +   |
| 115001 | PiD                          | NT | -   | -  | NT  | NT  |
| 118624 | PART                         | +  | -   | -  | -   | -   |
| 118648 | PART                         | +  | +   | +  | +   | +   |
| 112090 | PART                         | +  | +   | +  | +/- | +/- |
| 118375 | Normal                       | +  | -   | -  | -   | -   |
| 103053 | Normal                       | +  | +   | +  | +   | +   |
| 106711 | Normal                       | +  | +   | +  | NT  | NT  |
| 102391 | Normal                       | +  | +   | +  | NT  | NT  |
| 104057 | AD (no cognitive impairment) | +  | +   | +  | +   | +   |
| 118446 | AD (no cognitive impairment) | +  | +   | +  | +   | +   |
| 106960 | AD (no cognitive impairment) | +  | +   | +  | NT  | NT  |

#### Midfrontal cortex

| Case ID | Neuropathological diagnosis | PHF1 | GT-7 | GT-38 | RD3 | RD4 |
|---------|-----------------------------|------|------|-------|-----|-----|
| 112403  | AD                          | +    | +    | +     | NT  | NT  |
| 107516  | CBD                         | +    | -    | NT    | -   | NT  |
| 112401  | PSP                         | +    | -    | +/-   | -   | +   |
| 101486  | PSP                         | +    | -    | -     | -   | +   |
| 116508  | PSP                         | +    | -    | +/-   | -   | +   |
| 114511  | PSP                         | +    | -    | -     | -   | +   |
| 103782  | PSP                         | +    | +    | +     | +   | +   |
| 105564  | PiD                         | +    | -    | NT    | +   | +/- |
| 106814  | PiD                         | +    | +/-  | NT    | +/- | +/- |
| 111853  | PiD                         | +    | -    | -     | NT  | NT  |

## Locus coruleus

| Case ID | Neuropathological diagnosis  | PHF1 | GT-7 | GT-38 | RD3 | RD4 |
|---------|------------------------------|------|------|-------|-----|-----|
| 115892  | AD                           | +    | +    | +     | +   | NT  |
| 106329  | AD                           | +    | +    | +     | +   | NT  |
| 112964  | CBD                          | +    | -    | -     | +/- | NT  |
| 104282  | CBD                          | +    | +/-  | +/-   | +   | NT  |
| 114348  | PSP                          | +    | +    | +     | +   | NT  |
| 106959  | PSP                          | +    | +    | +     | +   | NT  |
| 107667  | PiD                          | +    | -    | -     | +   | NT  |
| 111853  | PiD                          | +    | -    | -     | +   | NT  |
| 105564  | PiD                          | +    | +/-  | +/-   | +   | NT  |
| 118624  | PART                         | +    | +/-  | +/-   | +   | NT  |
| 118446  | AD (no cognitive impairment) | +    | -    | -     | +   | NT  |
| 103053  | Normal                       | +    | +/-  | +/-   | +/- | NT  |

## Pons

| Case ID | Neuropathological diagnosis | PHF1 | GT-7 | GT-38 | RD3 | RD4 |
|---------|-----------------------------|------|------|-------|-----|-----|
| 115892  | AD                          | +    | -    | -     | -   | NT  |
| 106329  | AD                          | +    | -    | -     | -   | NT  |
| 104057  | AD                          | +    | +/-  | +/-   | +/- | NT  |
| 112964  | CBD                         | +    | -    | -     | -   | NT  |
| 105358  | CBD                         | +    | -    | -     | -   | NT  |
| 104282  | CBD                         | +    | -    | -     | +/- | NT  |
| 114348  | PSP                         | +    | -    | -     | -   | NT  |
| 111530  | PSP                         | +    | -    | -     | +/- | NT  |
| 106959  | PSP                         | +    | -    | -     | -   | NT  |
| 107667  | PiD                         | +    | -    | -     | +/- | NT  |
| 111853  | PiD                         | +    | -    | +/-   | +/- | NT  |
| 105564  | PiD                         | +    | -    | -     | +   | NT  |
| 118624  | PART                        | +/-  | -    | -     | -   | NT  |
| 118648  | PART                        | +    | -    | -     | -   | NT  |
| 112090  | PART                        | +/-  | -    | -     | -   | NT  |
| 118375  | Normal                      | +/-  | -    | -     | -   | NT  |

|        |                              |   |     |     |     |    |
|--------|------------------------------|---|-----|-----|-----|----|
| 118446 | AD (no cognitive impairment) | + | -   | -   | +   | NT |
| 103053 | Normal                       | + | +/- | +/- | +/- | NT |

Putamen and pallidum

| Case ID | Neuropathological diagnosis | PHF1 | GT-7 | GT-38 | RD3 | RD4 |
|---------|-----------------------------|------|------|-------|-----|-----|
| 118323  | CBD                         | NT   | -    | -     | NT  | NT  |
| 103782  | PSP                         | +    | -    | -     | NT  | NT  |
| 101407  | PSP                         | NT   | -    | -     | NT  | NT  |

Anterior cingulate

| Case ID | Neuropathological diagnosis | PHF1 | GT-7 | GT-38 | RD3 | RD4 |
|---------|-----------------------------|------|------|-------|-----|-----|
| 104281  | CBD                         | +    | -    | -     | NT  | NT  |

Substantia nigra

| Case ID | Neuropathological diagnosis | PHF1 | GT-7 | GT-38 | RD3 | RD4 |
|---------|-----------------------------|------|------|-------|-----|-----|
| 103782  | PSP                         | +    | -    | +/-   | +/- | +   |

**Supplemental Table 1. Summary of antibody staining of brain regions from tauopathies and no cognitive impairment controls.** PHF1, GT-7, GT-38, RD3, and RD4 antibody IHC staining is summarized for the angular gyrus, hippocampus, including transentorhinal cortex and dentate gyrus, midfrontal cortex, locus coeruleus, putamen and pallidum, anterior cingulate, and substantia nigra. Regions that were stained positive with antibody are indicated by +, regions that were negative for antibody staining are indicated by -, very weak or sparse staining is indicated by +/-, regions that were not tested with indicated antibodies are denoted by NT, not tested.

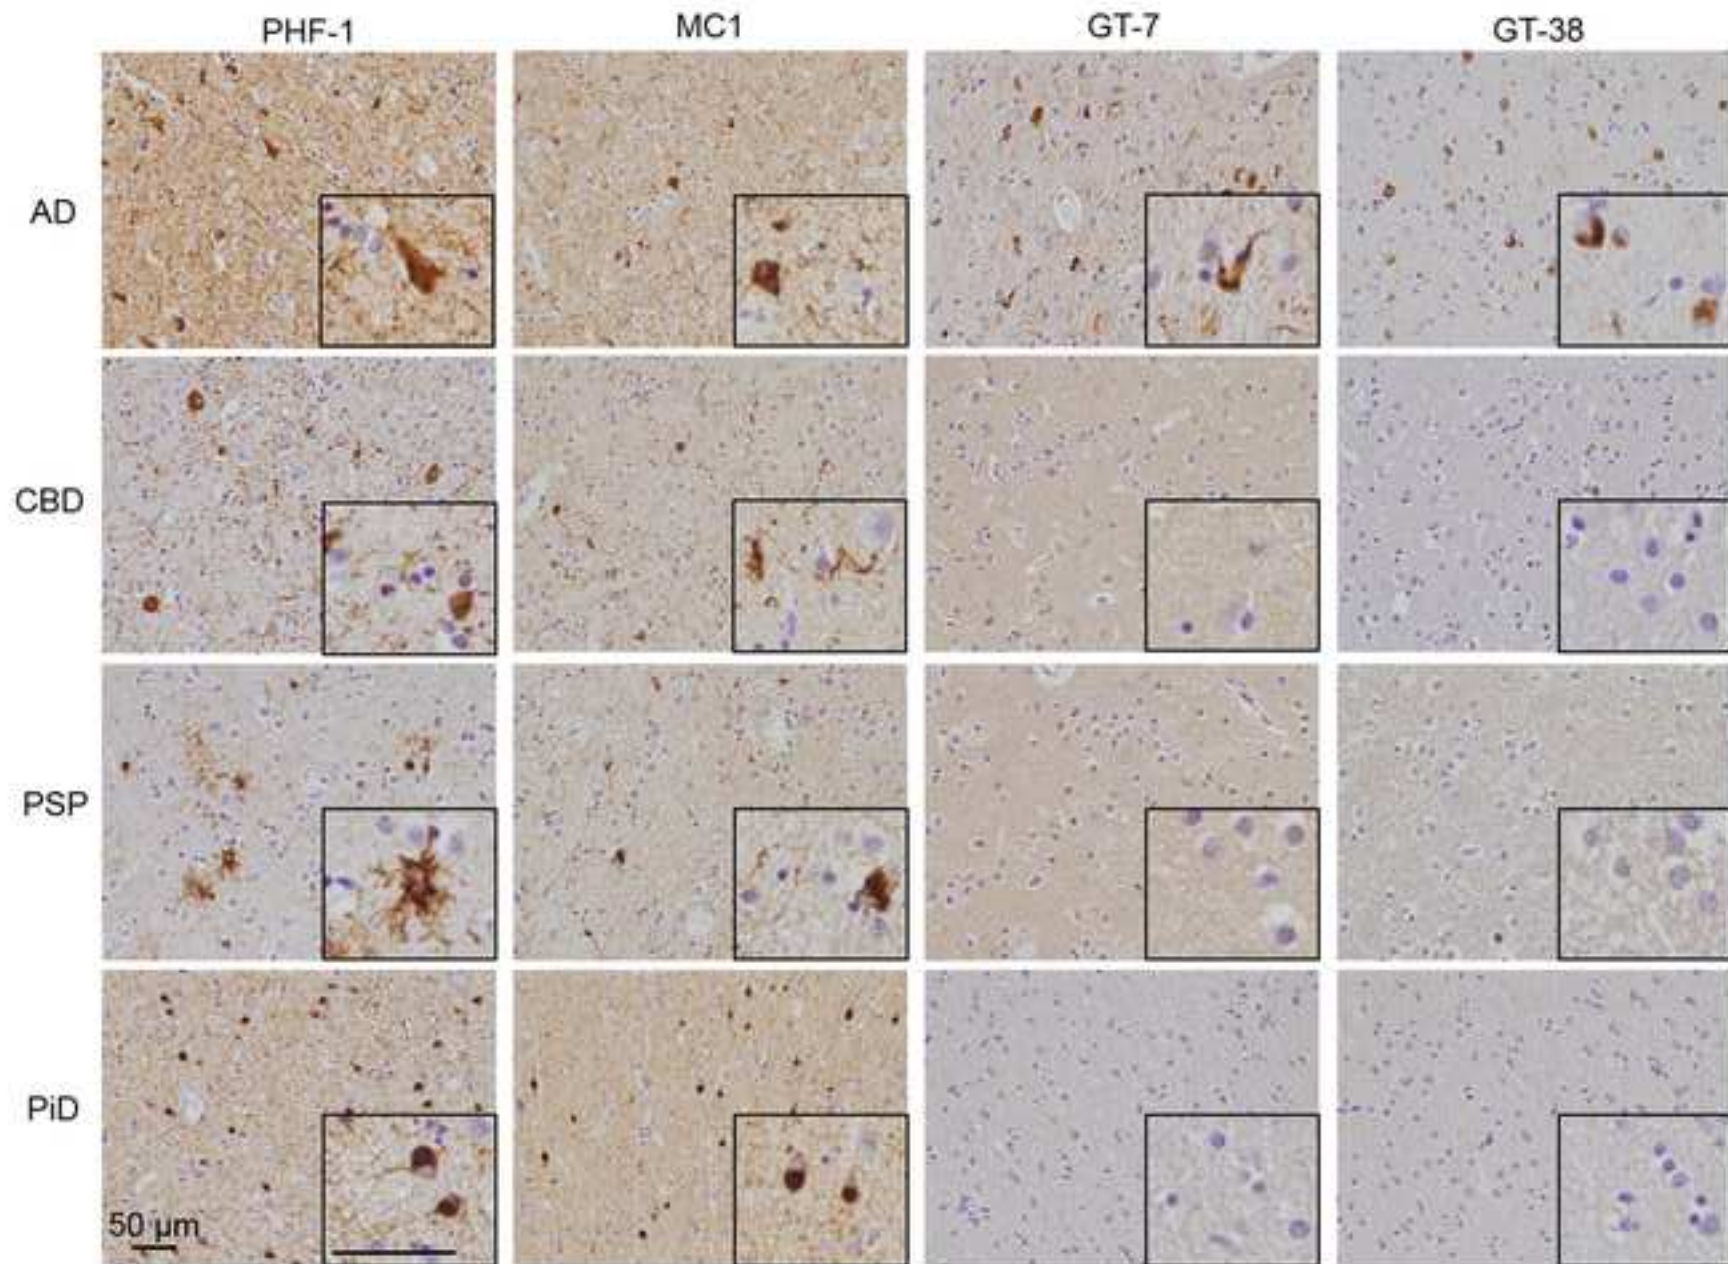

**Supplemental Figure 1.** Novel tau mAbs selectively label a subset of tauopathies by immunohistochemistry. Fixed, paraffin-embedded tissue from AD midfrontal cortex, CBD anterior cingulate, PSP putamen, and PiD midfrontal cortex were immunohistochemically stained with PHF1, conformation selective MC1, or novel AD-specific tau mAbs GT-7 and GT-38.

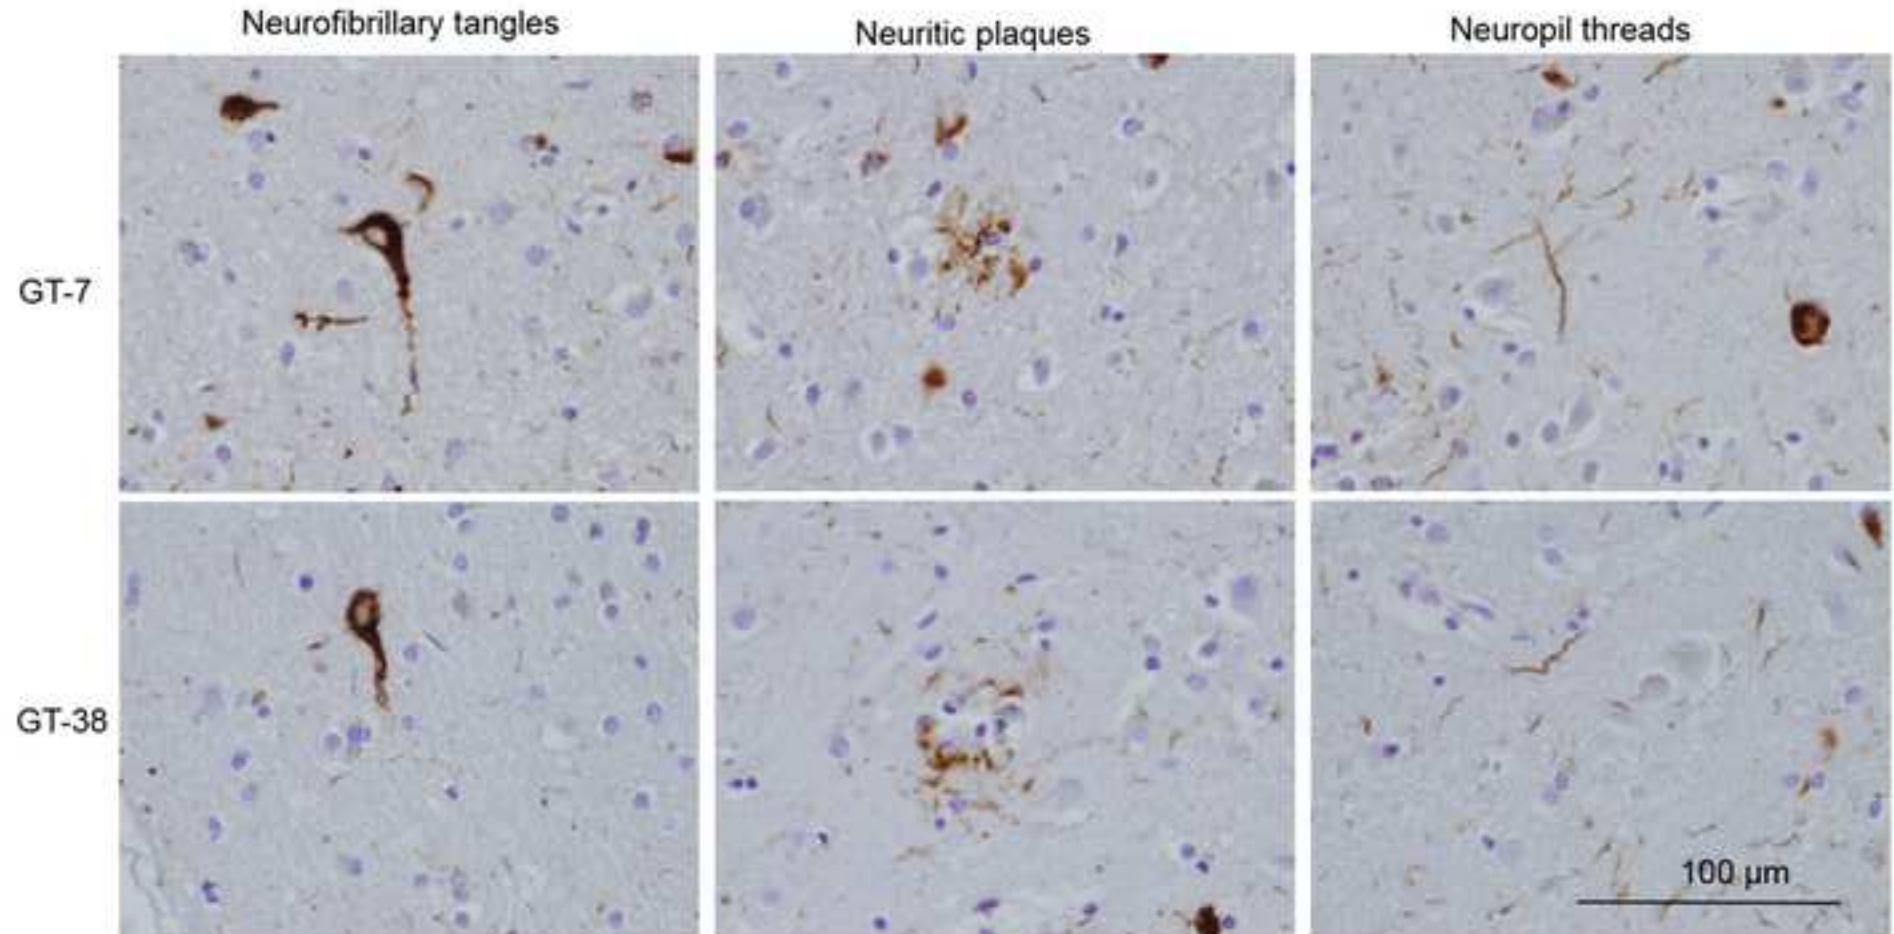

**Supplemental Figure 2.** GT-7 and GT-38 label NFTs, neuritic plaques, and neuropil threads, in AD. Fixed, paraffin-embedded tissue from AD hippocampus stained with GT-7 or GT-38 by IHC.



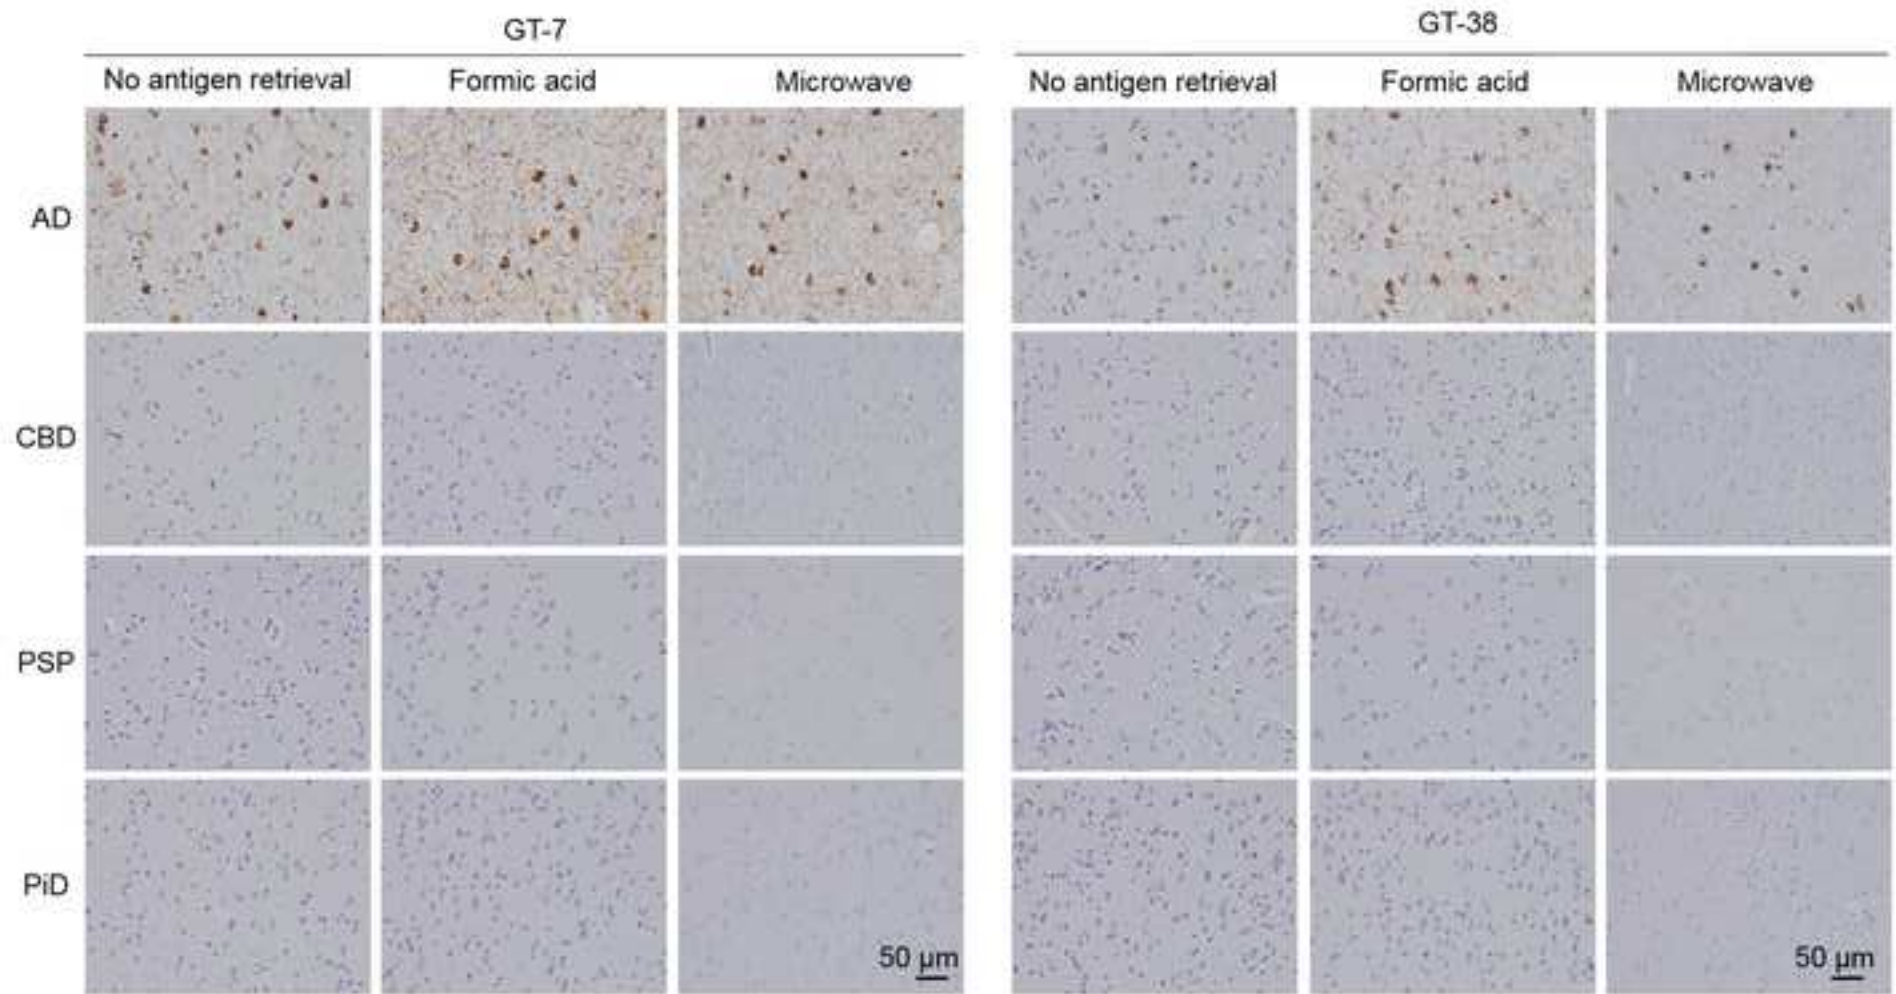

**Supplemental Figure 3.** Antigen retrieval conditions do not influence GT-7 and GT-38 tauopathy selectivity. Fixed, paraffin-embedded tissue from AD hippocampus, CBD putamen, PSP putamen, and PiD hippocampus were pretreated with either formic acid or citric acid/microwave antigen retrieval techniques or no pretreatment for IHC staining with GT-7 or GT-38.

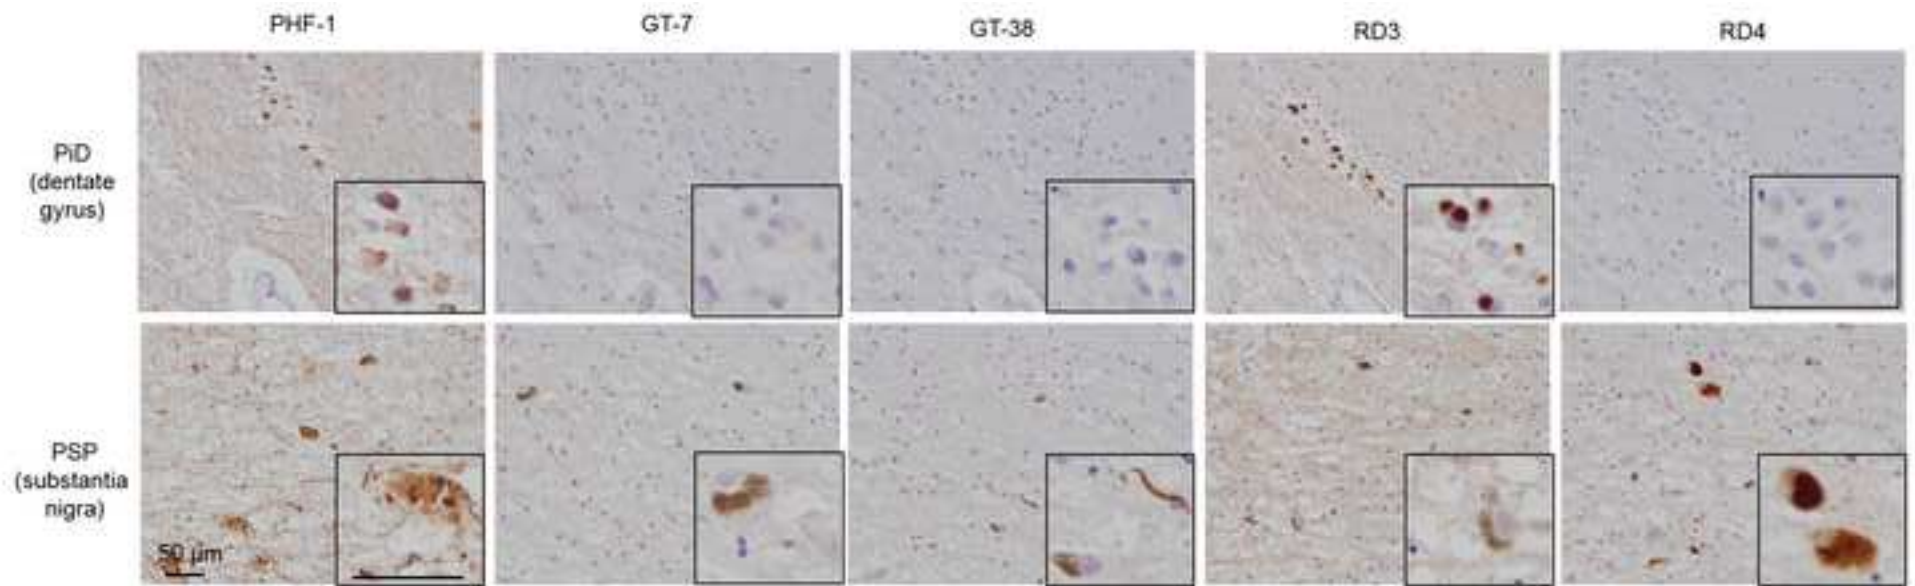

**Supplemental Figure 4.** Novel AD-specific tau mAbs GT-7 and GT-38 are negative or very rarely stain tau pathology in subcortical regions of PiD and PSP. PiD dentate gyrus dense pick bodies are negative for GT-7 and GT-38 immunoreactivity. PSP substantia nigra shows pigmented cells with tau pathology negative for GT-7 and a rare occasional neuropil thread detected by GT-38.
